# Supplementary material for: Phase I Trial of Encapsulated Rapamycin in Patients with Prostate Cancer Under Active Surveillance to Prevent Progression
Source: Oxford University Press journal article supplement (doi:10.1158/1940-6207.capr-20-0383), 2021-01-29
Supplement: 19406207capr200383-sup-247419_3_supp_6829922_qml1df.docx [file 19406207capr200383-sup-247419_3_supp_6829922_qml1df.docx]

**Supplemental Table 1: Immune cell phenotypes assessed during the study**

| **NK and T Memory Cell Lines** | **Exhaustion Cells Lines/Markers** |
| --- | --- |
| CD3+ naive memory T cells | CD3+ T cells |
| CD3+ central memory T cells | CD3+ CD4+ T cells |
| CD3+ naive T cells | CD3+ CD8 + T cells |
| CD3+ memory T cells | CD4+ CTL4+ T cells |
| CD3+ effector T cells | CD4+ LAG3+ T cells |
| CD3+ effector memory T cells | CD4+ TIM3+ T cells |
| CD4+ central memory T cells | CD4+ PD-1+ T cells |
| CD4+ naive memory T cells | CD8+ LAG3+ T cells |
| CD4+ memory T cells | CD8+ CTL4+ T cells |
| CD4+ effector T cells | CD8+ PD-1+ T cells |
| CD8+ naive memory T cells | CD8+ TIM3+ T cells |
| CD8+ central memory T cells |  |
| CD8+ memory T cell |  |
| CD8+ effector T cells |  |
| CD3- CD56+ NK cells |  |
| CD3+ CD56+ NK T cells |  |
